# Supplementary material for: Detection of SO2 derivatives using a new chalco-coumarin derivative in cationic micellar media: application to real samples
Source: Royal Society of Chemistry journal article supplement (doi:10.1039/c8ra04526g), 2018-01-01
Supplement: c8ra04526g1.pdf [file c8ra04526g1.pdf]

## Supporting Information

### Detection of SO<sub>2</sub> derivatives using a new chalco-coumarin derivative in a cationic micellar media. Application to real samples.

Marisol Gómez,<sup>a,b\*</sup> Margarita E. Aliaga,<sup>a</sup> Verónica Arancibia,<sup>a</sup> Alexis Moya,<sup>a</sup> Camilo Segura,<sup>c</sup> Marco T. Nuñez<sup>d</sup>, Pabla Aguirre,<sup>d</sup> Edgar Nagles<sup>e</sup> and Olimpo García-Beltrán.<sup>e,\*</sup>

<sup>a</sup>. *Facultad de Química, Pontificia Universidad Católica de Chile, Vicuña Mackenna 4860, Santiago, 7820436, Chile.*

<sup>b</sup>. *Escuela de Obstetricia y Puericultura and Centro Integrativo de Biología y Química Aplicada (CIBQA), Universidad Bernardo OHiggins, General Gana 1702, Santiago, 8370993, Chile.*

<sup>c</sup>. *Department of Chemistry, Faculty of Sciences, Universidad de Chile, Santiago 7800024, Chile.*

<sup>d</sup>. *Biology Department, Faculty of Sciences, Universidad de Chile, Santiago 7800024, Chile*

<sup>e</sup>. *Facultad de Ciencias Naturales y Matemáticas, Universidad de Ibagué, Carrera 22 Calle 67, Ibagué 730002, Colombia.*

## Table of contents

| Contents                                                                                                                                                                       | Page |
|--------------------------------------------------------------------------------------------------------------------------------------------------------------------------------|------|
| <b>Figure S1.</b> $^1\text{H}$ NMR ( $\text{DMSO-}d_6$ ) spectrum of ChC16.                                                                                                    | S3   |
| <b>Figure S2.</b> $^{13}\text{C}$ NMR ( $\text{DMSO-}d_6$ ) spectrum of ChC16.                                                                                                 | S4   |
| <b>Figure S3.</b> HRMS (ESI) of ChC16.                                                                                                                                         | S4   |
| <b>Figure S4. (A)</b> UV-Vis spectrum of ChC16 <b>(B)</b> UV-Vis spectrum of ChC16 in presence of CPB.                                                                         | S5   |
| <b>Figure S5. (A)</b> UV-Vis spectra of ChC16 at different concentration; <b>(B)</b> Plot of absorbance of probe ChC16 against its concentration from 1 to 4.5 $\mu\text{M}$ . | S5   |
| <b>Figure S6.</b> HRMS (ESI) of ChC16-SO <sub>3</sub> H                                                                                                                        | S6   |
| <b>Table S1.</b> Comparative summary of different probes reported by SO <sub>2</sub> -derivatives.                                                                             | S7   |
| <b>References</b>                                                                                                                                                              | S8   |

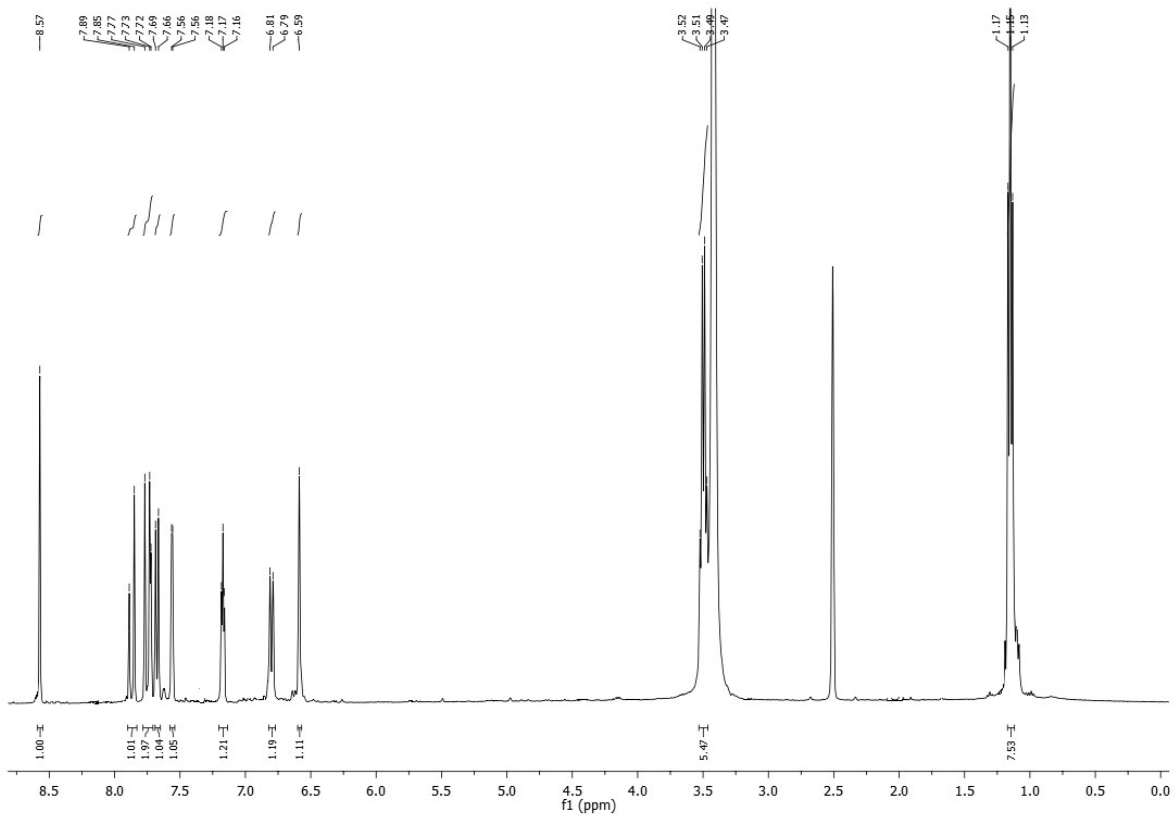

**Figure S1.**  $^1\text{H}$  NMR ( $\text{DMSO-}d_6$ ) spectrum of **ChC16**

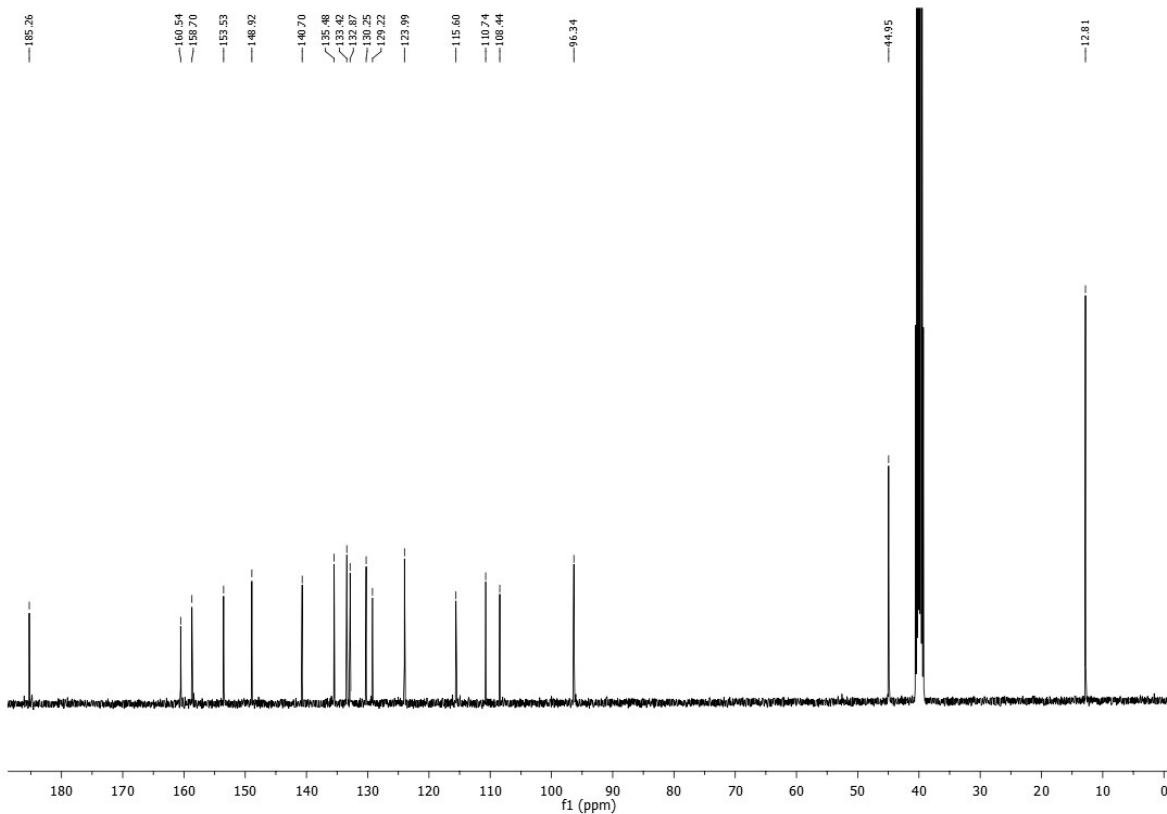

Figure S2.  $^{13}\text{C}$  NMR ( $\text{DMSO-}d_6$ ) spectrum of **ChC16**.

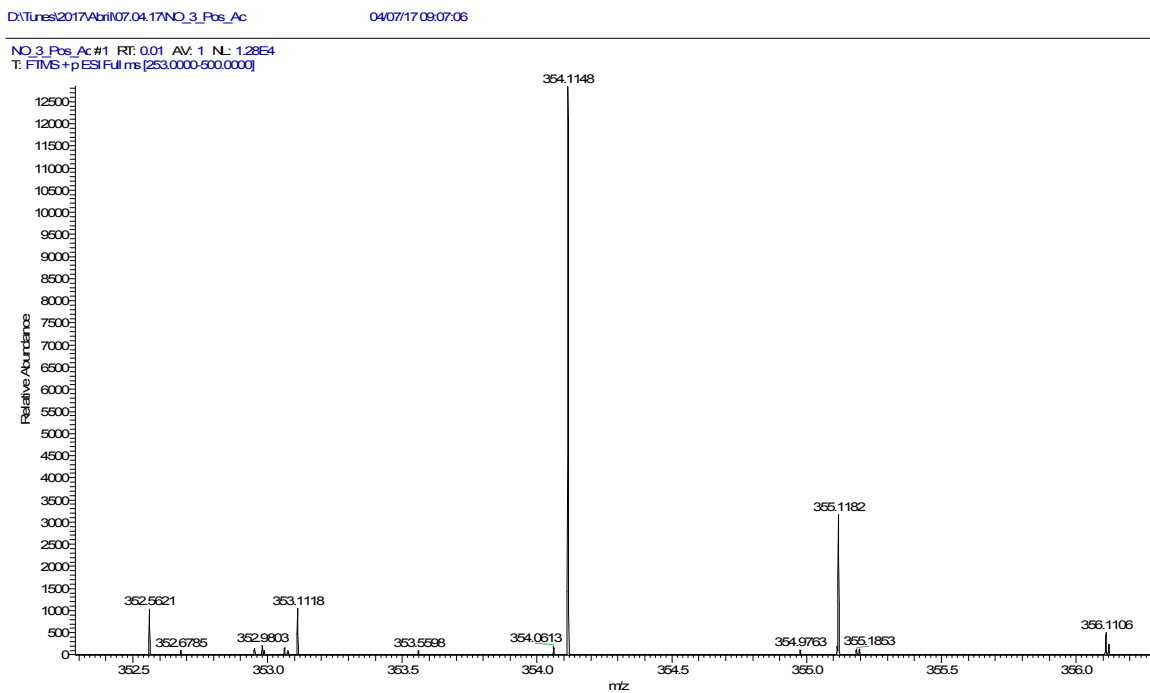

Figure S3. HRMS (ESI) of **ChC16** (Positive mode  $[M+1]=354.1148$  at 140000 resolution).

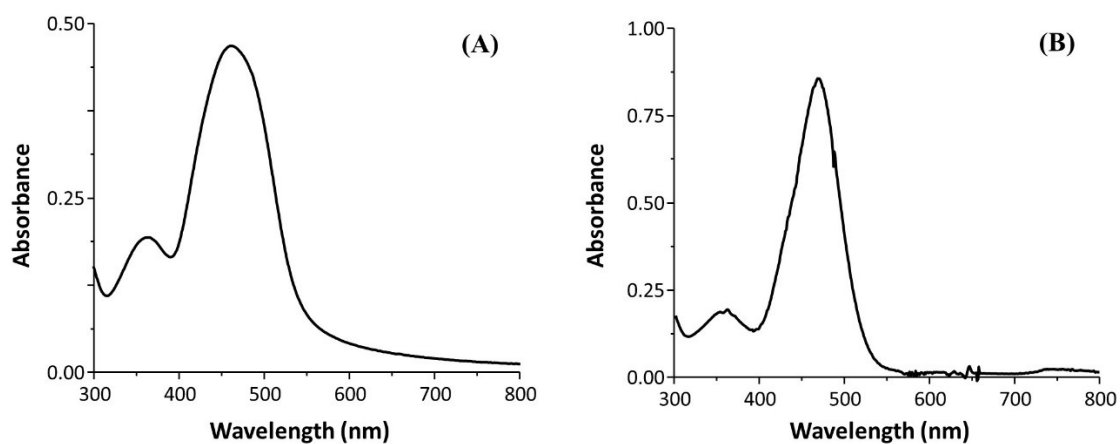

**Figure S4. (A)** UV-vis spectrum of **ChC16** and **(B)** UV-vis spectrum of **ChC16** in presence of CPB (1.5 mM).

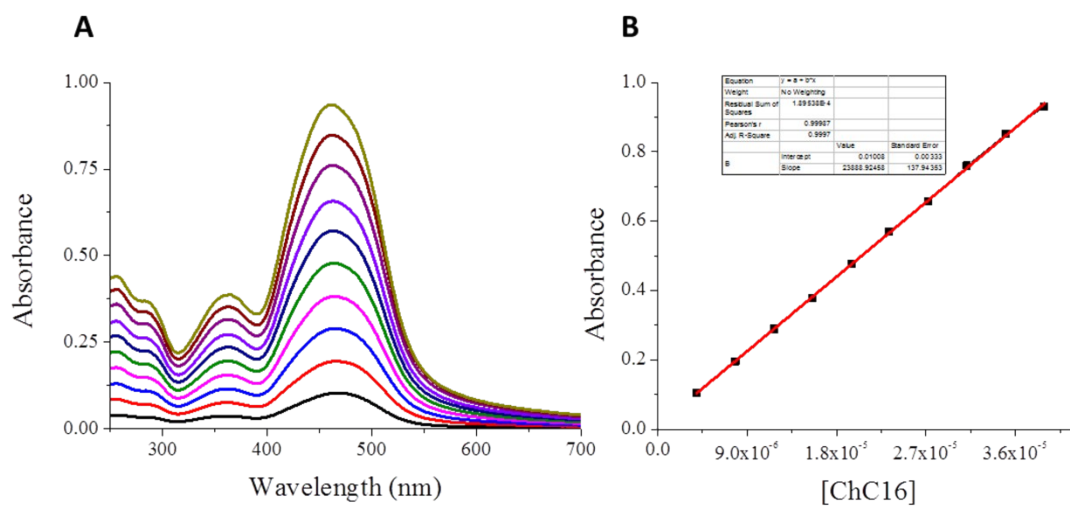

**Figure S5. (A)** UV-Vis spectra of **ChC16** at different concentration; **(B)** Plot of absorbance of probe **ChC16** against its concentration from 1 to 4.5  $\mu$ M.

ND-Sulfite\_Pos\_Ac\_170407092615 #16 RT: 0.14 AV: 1 NL: 1.71E4  
T: FIMS+pESFullms[340.000-440.000]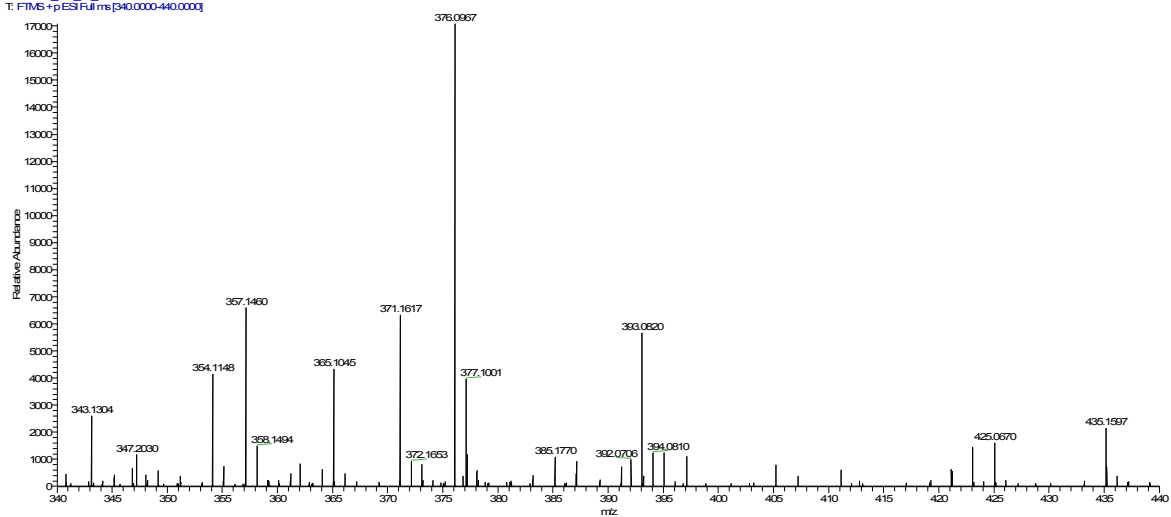

Figure S6. HRMS (ESI) of ChC16-SO<sub>3</sub>H (Positive mode [M+1]=435.1597 at 140000 resolution).

**Table S1.** Comparative summary of different probes reported by SO<sub>2</sub>-derivatives.

| Probe | Molecule                                                                            | Detection Limit | Response Time | Applications                                       | References |
|-------|-------------------------------------------------------------------------------------|-----------------|---------------|----------------------------------------------------|------------|
| 1     | 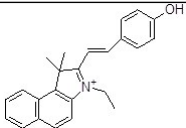   | 1.39 nM         | 30 min        | Living cell Bioimaging                             | 1          |
| 2     |    | 28 nM           | 140 s         | Living cell and environment                        | 2          |
| 3     |    | 10.6 nM         | 10 s          | Dry white wine                                     | 3          |
| 4     |    | 12.85 nM        | 180 s         | Living cell imaging                                | 4          |
| 5     |   | 25 nM           | 60 s          | Living cell imaging                                | 5          |
| 6     |  | 58.6 nM         | 90 s          | Living cell imaging                                | 6          |
| 7     |  | 85 nM           | 30 s          | Living cell imaging                                | 7          |
| 8     |  | 390 nM          | <5 s          | Living cell imaging, Brain Tissues and Zebrafishes | 8          |
| 9     |  | 1730 nM         | 4 min         | Cancer cell                                        | 9          |
| 10    |  | 2340 nM         | 4 min         | Cancer cell                                        | 9          |
| 11    |  | 3.5 nM          | 30 min        | Cell and in vivo                                   | 10         |

|    |                                                                                     |          |               |                                |           |
|----|-------------------------------------------------------------------------------------|----------|---------------|--------------------------------|-----------|
| 12 | 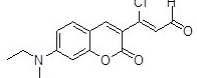   | 8.8 nM   | 4 min         | Bioimaging                     | 11        |
| 13 |    | 7.4 nM   | 15 s          | Food Sample and Living systems | 12        |
| 14 |    | 87 nM    | 30s           | Food and living cell           | 13        |
| 15 |    | 28.2 μM  | 30 min/30 min | Wine/Bioimaging                | 14        |
| 16 |    | 0.77 μM  | 2 min         | Living cell imaging            | 15        |
| 17 |    | 1.9 nM   | 5 min         | Living cell imaging            | 16        |
| 18 |   | 6.3 μM   | 30 min        | Sugar                          | 17        |
| 19 |  | 1.76 μM  | 2 min         | Sugar                          | 18        |
| 20 |  | 0.187 μM | 2 min         | Water<br>Sugar                 | 19        |
| 16 |  | 240 nM   | 15 min        | Wine/<br>Bioimaging            | This work |

## References

- 1 T. Yu, G. Yin, T. Niu, P. Yin, H. Li, Y. Zhang, H. Chen, Y. Zeng and S. Yao, *Talanta*, 2018, **176**, 1–7.
- 2 Z. Ye, C. Duan, R. Sheng, J. Xu, H. Wang and L. Zeng, *Talanta*, 2018, **176**, 389–396.
- 3 A. Liu, R. Ji, S. Shen, X. Cao and Y. Ge, *New J. Chem.*, 2017, **41**, 10096–10100.
- 4 L. Zhang, Z. Wang, J. Liu, J. Miao and B. Zhao, *Sensors Actuators B. Chem.*, 2017, **253**, 19–26.



- 5 W. Xu, P. Ma, Q. Diao, L. Xu, X. Liu, Y. Sun, X. Wang and D. Song, *Sensors Actuators B Chem.*, 2017, **252**, 86–94.
- 6 Y. Wang, Q. Meng, R. Zhang, H. Jia, C. Wang and Z. Zhang, *J. Lumin.*, 2017, **192**, 297–302.
- 7 L. Wang, W. Li, W. Zhi, D. Ye, Y. Wang, L. Ni and X. Bao, *Dye. Pigment.*, 2017, **147**, 357–363.
- 8 Y. Ma, Y. Tang, Y. Zhao, S. Gao and W. Lin, *Anal. Chem.*, 2017, **89**, 9388–9393.
- 9 J. Wang, Y. Hang, H. Tan, T. Jiang, X. Qu and J. Hua, *J. Photochem. Photobiol. A Chem.*, 2017, **346**, 265–272.
- 10 K. Dou, Q. Fu, G. Chen, F. Yu, Y. Liu, Z. Cao, G. Li, X. Zhao, L. Xia, L. Chen, H. Wang and J. You, *Biomaterials*, 2017, **133**, 82–93.
- 11 C. Yin, X. Li, Y. Yue, J. Chao, Y. Zhang and F. Huo, *Sensors Actuators B Chem.*, 2017, **246**, 615–622.
- 12 T. Gao, X. Cao, P. Ge, J. Dong, S. Yang, H. Xu, Y. Wu, F. Gao and W. Zeng, *Org. Biomol. Chem.*, 2017, **15**, 4375–4382.
- 13 M. Li, W. Feng, H. Zhang and G. Feng, *Sensors Actuators B Chem.*, 2017, **243**, 51–58.
- 14 M. Gómez, E. G. Perez, V. Arancibia, C. Iribarren, C. Bravo-Díaz, O. García-Beltrán and M. E. Aliaga, *Sensors Actuators B Chem.*, 2017, **238**, 578–587.
- 15 J. Chao, X. Wang, Y. Liu, Y. Zhang, F. Huo, C. Yin, M. Zhao, J. Sun and M. Xu, *Sensors Actuators B Chem.*, 2018, **272**, 195–202.
- 16 J. Chao, H. Wang, Y. Zhang, C. Yin, F. Huo, J. Sun and M. Zhao, *New J. Chem.*, 2018, **42**, 3322–3333.
- 17 J. Chao, Y. Liu, Y. Zhang, Y. Zhang, F. Huo, C. Yin, Y. Wang and L. Qin, *Spectrochim. Acta Part A Mol. Biomol. Spectrosc.*, 2015, **146**, 33–37.
- 18 J. Chao, Y. Zhang, H. Wang, Y. Zhang, F. Huo, C. Yin, L. Qin and Y. Wang, *Sensors Actuators B Chem.*, 2013, **188**, 200–206.
- 19 Y. Yang, F. Huo, J. Zhang, Z. Xie, J. Chao, C. Yin, H. Tong, D. Liu, S. Jin, F. Cheng and X. Yan, *Sensors Actuators B Chem.*, 2012, **166–167**, 665–670.
